# Supplementary material
Source: publisher figshare collection journal article supplement (https://frontiersin.figshare.com/ndownloader/files/13635503)
Supplement: Supplementary file [file 13635503]

## **Evolutionary evidence of algal polysaccharide degradation acquisition by *Pseudoalteromonas carrageenovora* 9<sup>T</sup> to adapt to macroalgal niches**

Angélique Gobet, Tristan Barbeyron, Maria Matard-Mann, Ghislaine Magdelenat, David Vallenet, Eric Duchaud and Gurvan Michel

### **Supplementary files**

#### **Supplementary figures:**

**Fig. S1. Phylogeny of the order *Alteromonadales* based on the 16S rRNA gene.** Presence of the cellulose synthesis operon, the alginate operon and the carrageenolytic operon in genomes of the corresponding *Pseudoalteromonas* in the phylogenetic tree is indicated by a colored symbol: a green circle, an orange diamond and a red square, respectively (details in **table S6**). Only bootstrap values above 50% are shown.

#### **Supplementary tables:**

**Table S1. List of all the carbon sources used to test growth of the bacterium *Pseudoalteromonas carrageenovora* 9<sup>T</sup>.**

**Table S2. Number of annotated genes for each glycoside hydrolase, polysaccharide lyase and sulfatase family in the two chromosomes and the plasmid of *Pseudoalteromonas carrageenovora* 9<sup>T</sup>.** GH, Glycoside hydrolases; PL, Polysaccharide lyases. Sulfatase gene counts are indicated for each subfamily.

**Table S3. Genes identified as putative CAZymes, sulfatases or other proteins involved in the metabolism of polysaccharides located in the chromosome I, the chromosome II and the plasmid.** Colored boxes indicate the genes belonging to an operon or a PUL and the TonB-dependent receptors are indicated in bold. PUL, polysaccharide utilization loci.

**Table S4. Details of the putative genes present in the genome of *Pseudoalteromonas carrageenovora* 9<sup>T</sup> that may act to degrade the highlighted carbohydrate sources.**

**Table S5. All genes present on the plasmid and their putative functions.** Colored boxes indicate the genes belonging to an operon or a PUL and the TonB-dependent receptors are indicated in bold. PUL, polysaccharide utilization loci.

**Table S6. Screening of genes and gene clusters involved in carbohydrate degradation from the genome of *Pseudoalteromonas carrageenovora* 9<sup>T</sup> found in other *Pseudoalteromonas* genomes that may have been acquired from HGT.** Genes or cluster of genes are considered present when the identity between sequences reaches at least 30% and 80% of coverage. Presence of genes or gene clusters are indicated by 1, 0 otherwise. Presence of the cellulose synthesis operon, the alginate operon and the carrageenolytic operon is indicated by a colored symbol in the 16S rRNA gene phylogenetic tree (Fig. S1). PUL, polysaccharide utilization loci.

**Table S7. Number of genes homologous to genes in the plasmid of *Pseudoalteromonas carrageenovora* 9<sup>T</sup> present in 62 *Pseudoalteromonas* replicons corresponding to 52 *Pseudoalteromonas* genomes. Only genes with a sequence coverage of at least 80% and a seq. id. of 30% minimum were considered.**

**Table S8. List of the proteins corresponding to the gene clusters PCAR9\_p0019-PCAR9\_p0052 and PCAR9\_p0067-PCAR9\_p0073 on the plasmid of *Pseudoalteromonas carrageenovora* 9<sup>T</sup> in the respective genomes of the *Gammaproteobacteria* [*Pseudoalteromonas atlantica*] T6c, the *Planctomycetes Rhodopirellula* sp. SWK7, and of the *Bacteroidetes Zobellia galactanivorans* DsijT and *Flavobacteriaceae* bacterium S85. Genes ID are indicated as stated in the MicroScope website. Their sequence identity with homologous genes in *P. carrageenovora* is indicated.**
